# Supplementary material for: Rapid and efficient removal of phosphate by La-doped layered double hydroxide/biochar from aqueous solution
Source: Royal Society of Chemistry journal article supplement (doi:10.1039/d3nj05213c), 2024-01-01
Supplement: d3nj05213c1.pdf [file d3nj05213c1.pdf]

**Supplementary Information For:**

**Rapid and efficient removal of phosphate by La-doped  
layered double hydroxide/biochar from aqueous solution**

Zhuolin Qing<sup>a</sup>, Qirui Qin<sup>a</sup>, Liangjie Wang<sup>b</sup>, Chunsheng Jiang<sup>a</sup>, Zekun Yang<sup>a</sup>, Yue Liu<sup>a</sup>, Shengli

Zhang<sup>a</sup>, Junmin Chen<sup>a\*</sup>

<sup>a</sup> Faculty of Geosciences and Environmental Engineering, Southwest Jiaotong University,

Chengdu 611756, China

<sup>b</sup> Water Science and Environmental Engineering Research Center, College of Chemical and

Environmental Engineering, Shenzhen University, Shenzhen 518060, China

\*Corresponding author.

E-mail

address:

cjm@

swjtu.edu.cn

## Figure Captions

Fig. S1 XRD patterns of BC, La-MgAl-LDH, La- MgAl-LDH/BC, P-loaded La- MgAl-LDH/BC.

Fig. S2 SEM images spectra of the La-MgAl-LDH/BC before adsorption.

Fig. S3 Pore size distributions of adsorbents.

Fig. S4 The phosphate removal ratio with initial phosphate concentration of 5 mg/L.

Fig. S5 SEM images and EDS spectra of the La-MgAl-LDH/BC before and after adsorption (a)-(d).

Fig. S6 FT-IR spectra of La-MgAl-LDH/BC and P-loaded La-MgAl-LDH/BC.

Fig. S7 XPS spectra of BC, La-MgAl-LDH, La-MgAl-LDH/BC, P-loaded La-MgAl-LDH/BC (a), P element XPS spectra (b), Cl element XPS spectra (c).

Fig. S8 Phosphate removal ratio of La-MgAl-LDH/BC in environmental water samples (a); recycle adsorption experiments of La-MgAl-LDH/BC for phosphate (b).

Fig. S9 The leaching of Mg, Al and La element of La-MgAl-LDH/BC after adsorption.

## **Table Captions**

Table S1 Composition of La-MgAl-LDH composites.

Table S2 Pore parameters of adsorbents.

Table S3 Fitting result of adsorption kinetics.

Table S4 Parameters of phosphate adsorption isotherms.

Table S5 Interlayer spacing changes of La-MgAl-LDH/BC before and after adsorption.

Table S6 Relative weight percentage of elements in XPS.

Table S7 Fitting parameters of C 1s and O 1s peak of La-MgAl-LDH/BC before and after phosphate adsorption.

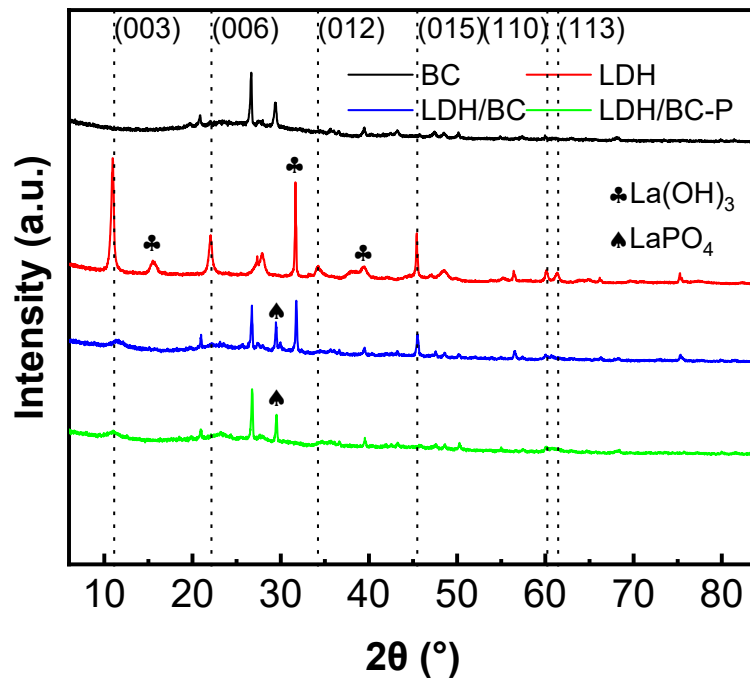

Fig. S1 XRD patterns of BC, La-MgAl-LDH, La- MgAl-LDH/BC, P-loaded La- MgAl-LDH/BC.

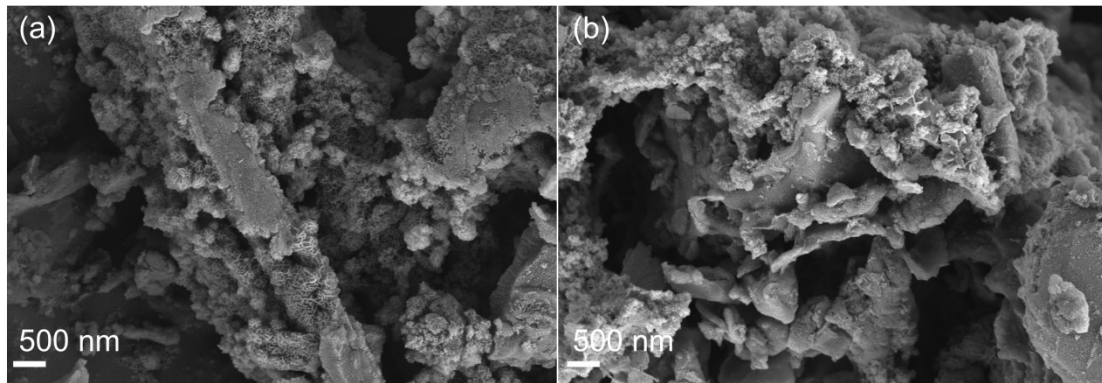

Fig. S2 SEM images spectra of the La-MgAl-LDH/BC before adsorption.

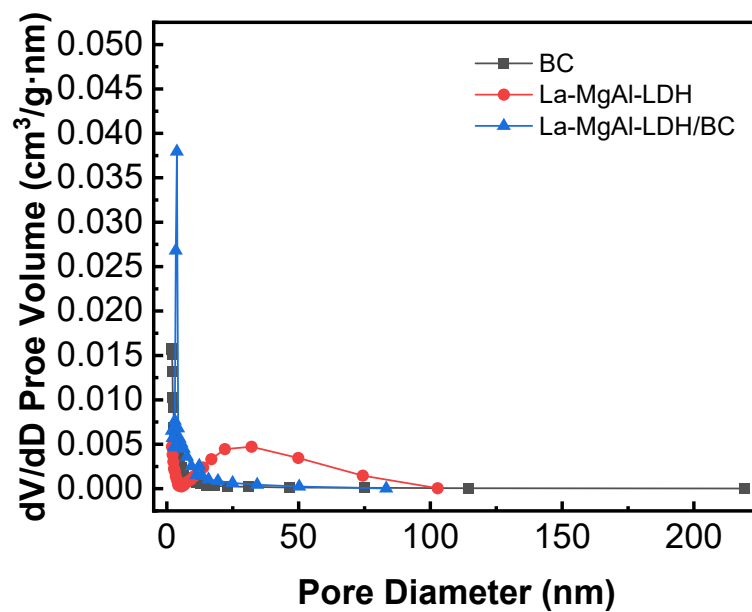

Fig. S3 Pore size distributions of adsorbents.

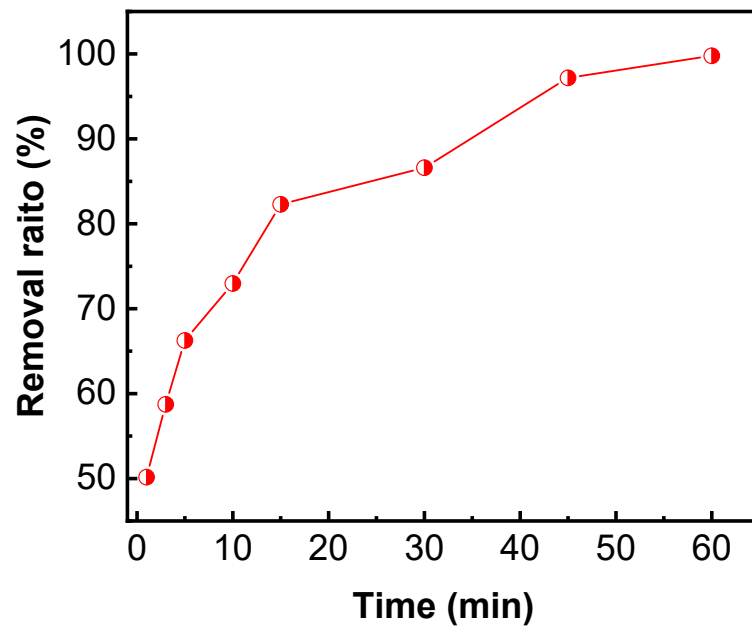

Fig. S4 The phosphate removal ratio with initial phosphate concentration of 5 mg/L (pH=6, T=25°C, adsorbent dosage 0.4 g/L, t=1 h).

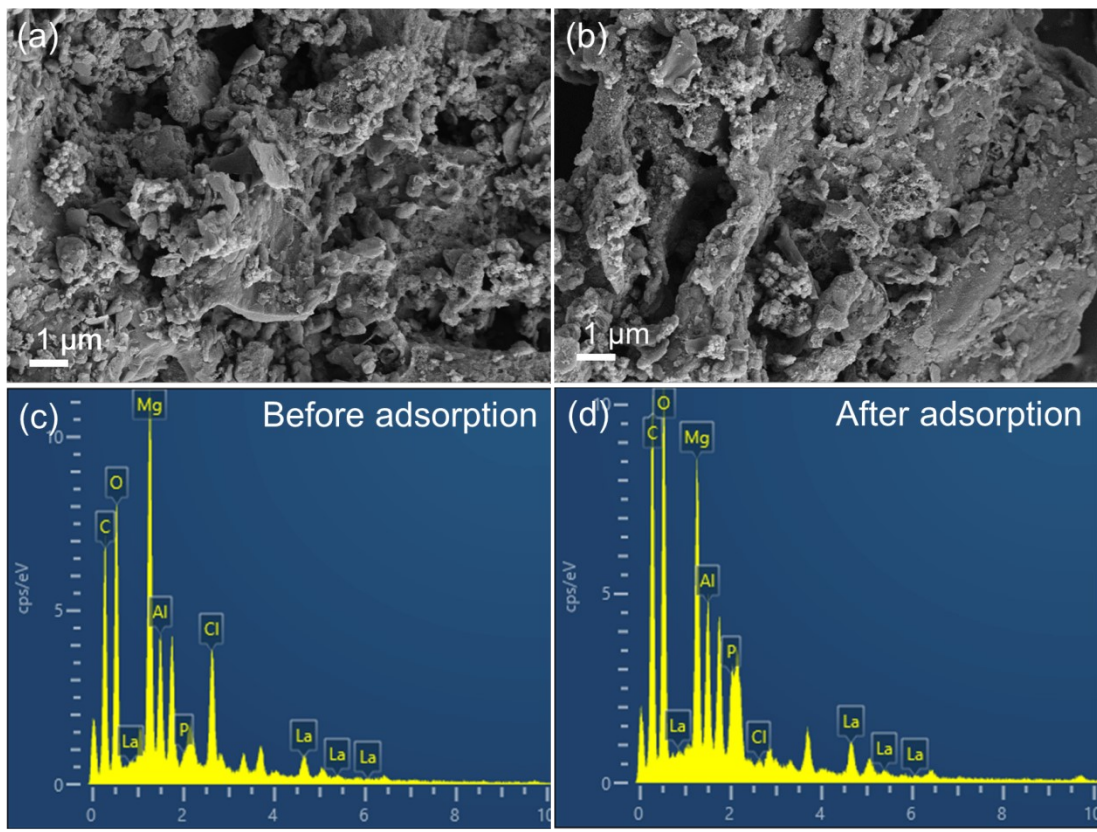

Fig. S5 SEM images and EDS spectra of the La-MgAl-LDH/BC before and after adsorption (a)-  
(d).



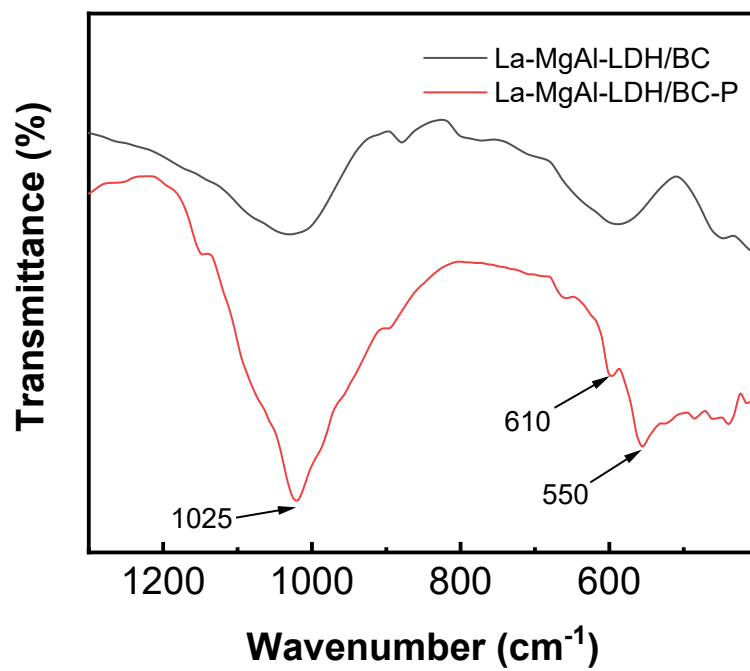

Fig. S6 FT-IR spectra of La-MgAl-LDH/BC and P-loaded La-MgAl-LDH/BC.

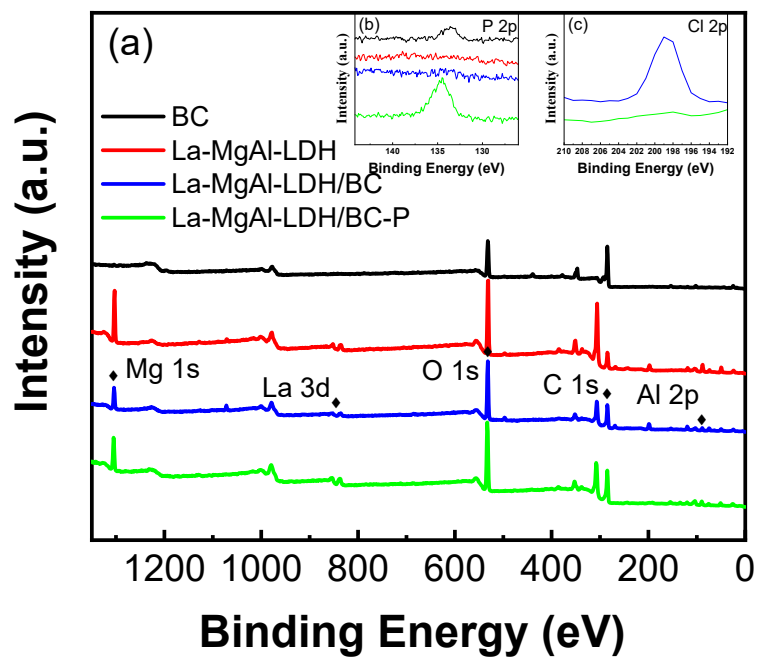

Fig. S7 XPS spectra of BC, La-MgAl-LDH, La-MgAl-LDH/BC, P-loaded La-MgAl-LDH/BC (a), P element XPS spectra (b), Cl element XPS spectra (c).

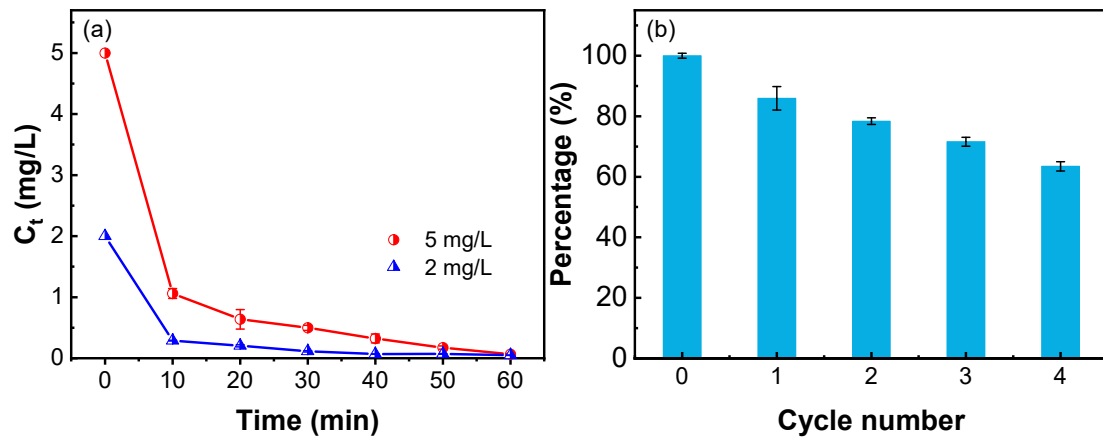

Fig. S8 Phosphate removal ratio of La-MgAl-LDH/BC in environmental water samples (a) ( $C_0=2$  and 5 mg/L, pH=8.16,  $T=25^\circ\text{C}$ , adsorbent dosage=1 g/L and  $t=1$  h); recycle adsorption experiments of La-MgAl-LDH/BC for phosphate (b) ( $C_0= 10$  mg/L, pH 6,  $T=25^\circ\text{C}$ , adsorbent dosage=0.4 g/L,  $t=1$  h and the La-LDH/BC was desorbed by 1 mol/L NaOH ).

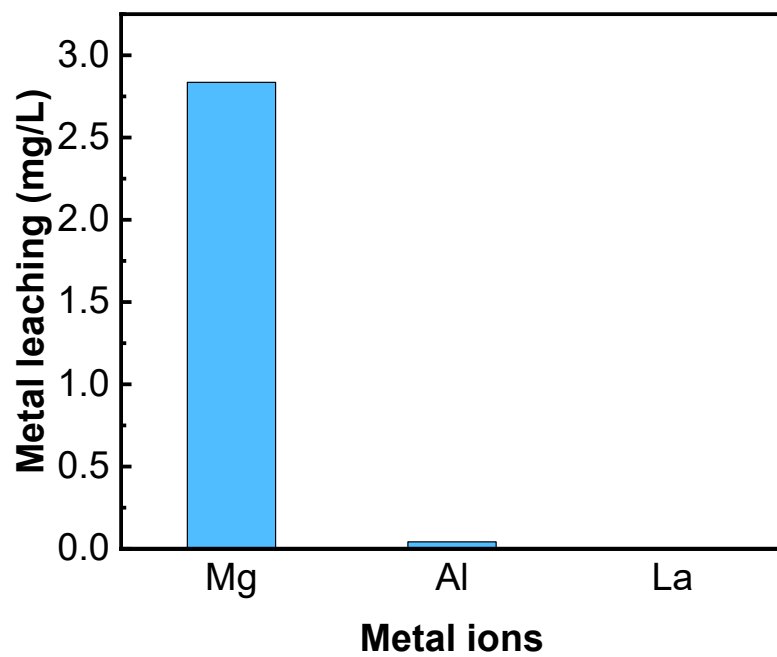

Fig. S9 The leaching of Mg, Al and La element of La-MgAl-LDH/BC after adsorption.

Table S1 Composition of La-MgAl-LDH composites.

| LDH material | La:Al:Mg molar ratio | Dosage (g)                            |                   |                   |
|--------------|----------------------|---------------------------------------|-------------------|-------------------|
|              |                      | LaCl <sub>3</sub> • 7H <sub>2</sub> O | AlCl <sub>3</sub> | MgCl <sub>2</sub> |
| LDH          | 0:1:3                | 0                                     | 2.67              | 5.71              |
| 0.1La-LDH    | 0.1:0.9:3            | 0.74                                  | 2.40              | 5.71              |
| 0.2La-LDH    | 0.2:0.9:3            | 1.49                                  | 2.13              | 5.71              |
| 0.3La-LDH    | 0.3:0.9:3            | 2.23                                  | 1.87              | 5.71              |
| 0.5La-LDH    | 0.5:0.9:3            | 3.71                                  | 1.33              | 5.71              |

Table S2 Pore parameters of adsorbents.

| Sample    | SBET (m <sup>2</sup> /g) | S <sub>micro</sub><br>(m <sup>2</sup> /g) | S <sub>external</sub><br>(m <sup>2</sup> /g) | V <sub>pore</sub><br>(cm <sup>3</sup> /g) | D <sub>pore</sub> (nm) |
|-----------|--------------------------|-------------------------------------------|----------------------------------------------|-------------------------------------------|------------------------|
| BC        | 238.7                    | 192.6                                     | 46.0                                         | 0.08                                      | 4.66                   |
| La-LDH    | 40.9                     |                                           | 54.0                                         | 0.01                                      | 25.83                  |
| La-LDH/BC | 177.4                    | 111.8                                     | 65.6                                         | 0.05                                      | 5.93                   |

Table S3 Fitting result of adsorption kinetics.

| Kinetic model            | Parameter                            | Initial concentration (mg/L) |       |       |       |
|--------------------------|--------------------------------------|------------------------------|-------|-------|-------|
|                          |                                      | 5                            | 10    | 20    | 50    |
| Pseudo-first-order       | $k_1$ ( $\text{min}^{-1}$ )          | 0.52                         | 0.56  | 0.26  | 0.13  |
|                          | $q^e$ (mg/g)                         | 10.4                         | 12.9  | 17.3  | 46.63 |
|                          | $R^2$                                | 0.62                         | 0.82  | 0.89  | 0.99  |
| Pseudo-second-order      | $k_2$ (g/mg/min)                     | 0.07                         | 0.06  | 0.02  | 0.16  |
|                          | $q_e$ (mg/g)                         | 11.2                         | 13.9  | 18.9  | 53.84 |
|                          | $R^2$                                | 0.97                         | 0.94  | 0.95  | 0.99  |
|                          | $K_{1pd}$ (mg/g/min <sup>0.5</sup> ) | 1.73                         | 3.74  | 4.10  | 12.45 |
|                          | $C$ (mg/g)                           | 4.40                         | 3.01  | 2.45  | -5.22 |
|                          | $R^2$                                | 0.99                         | 0.91  | 0.94  | 0.99  |
| Intraparticle- diffusion | $K_{2pd}$ (mg/g/min <sup>0.5</sup> ) | 1.21                         | 1.03  | 2.46  | 11.31 |
|                          | $C$ (mg/g)                           | 5.50                         | 8.48  | 6.90  | -2.81 |
|                          | $R^2$                                | 0.97                         | 0.95  | 0.90  | 0.99  |
|                          | $K_{3pd}$ (mg/g/min <sup>0.5</sup> ) | 0.37                         | 0.53  | 0.80  | 1.64  |
|                          | $C$ (mg/g)                           | 8.83                         | 10.30 | 12.57 | 35.22 |
|                          | $R^2$                                | 0.99                         | 0.85  | 0.91  | 0.95  |

Table S4 Parameters of phosphate adsorption isotherms.

| Kinetic model | Parameter              | Temperature (K) |        |        |
|---------------|------------------------|-----------------|--------|--------|
|               |                        | 288.15          | 298.15 | 308.15 |
| Langmuir      | $q_{\max}$ (mg/g)      | 212.1           | 230.5  | 249.3  |
|               | $K_L$ (L/mg)           | 0.0045          | 0.0047 | 0.006  |
|               | $R^2$                  | 0.94            | 0.95   | 0.95   |
| Freundlich    | $K_F$ (g/mg/min)       | 8.39            | 9.17   | 12.03  |
|               | $n$                    | 0.47            | 0.47   | 0.43   |
|               | $R^2$                  | 0.86            | 0.94   | 0.95   |
| Thermodynamic | $\Delta G^0$ (kJ/mol)  | -20.15          | -20.96 | -22.29 |
|               | $\Delta S^0$ (J/mol/K) |                 | 10.71  |        |
|               | $\Delta H^0$ (kJ/mol)  |                 | 106.8  |        |



Table S5 Interlayer spacing changes of La-MgAl-LDH/BC before and after adsorption.

| Sample            | $d_{003}$ (Å) | $d_{110}$ (Å) | a (Å) | c (Å) | Interlayer spacing (Å) |
|-------------------|---------------|---------------|-------|-------|------------------------|
| Before adsorption | 7.96          | 1.54          | 3.08  | 23.88 | 3.16                   |
| After adsorption  | 8.26          | 1.52          | 3.04  | 24.78 | 3.46                   |

Table S6 Relative weight percentage of elements in XPS.

| Atom | BC (%) | La-LDH (%) | La-LDH/BC (%) | La-LDH/BC-P (%) |
|------|--------|------------|---------------|-----------------|
| C    | 72.72  | 31.49      | 43.34         | 45.49           |
| O    | 23.71  | 46.14      | 37.87         | 38.00           |
| Cl   | 0.05   | 0.83       | 1.87          | 0.09            |
| La   | 0      | 0.75       | 0.51          | 0.78            |
| Al   | 2.16   | 6.28       | 6.82          | 6.54            |
| Mg   | 0.56   | 14.50      | 9.63          | 7.31            |
| P    | 0.80   | 0          | 0.97          | 1.79            |

Table S7 Fitting parameters of C 1s and O 1s peak of La-MgAl-LDH/BC before and after phosphate adsorption.

| Atom | Samples           | Binding Energy | Peak             | Percentage (%) |
|------|-------------------|----------------|------------------|----------------|
| C 1s | Before adsorption | 284.77         | C-C              | 29.69          |
|      |                   | 285.89         | C-O-C            | 11.03          |
|      |                   | 289.73         | O-C=O            | 2.62           |
|      | After adsorption  | 284.67         | C-C              | 23.52          |
|      |                   | 285.96         | C-O-C            | 17.47          |
|      |                   | 289.94         | O-C=O            | 4.51           |
| O 1s | Before adsorption | 531.70         | M-O              | 9.82           |
|      |                   | 532.47         | M-OH             | 17.42          |
|      |                   | 533.19         | H <sub>2</sub> O | 10.63          |
|      | After adsorption  | 532.13         | M-O              | 10.95          |
|      |                   | 532.86         | M-OH             | 15.24          |
|      |                   | 533.76         | H <sub>2</sub> O | 11.80          |
